# Supplementary material for: Predictive Value of Interstitial Lung Abnormalities for Postoperative Pulmonary Complications in Elderly Patients with Early-Stage Lung Cancer
Source: PubMed Central journal article supplement — Cancer Res Treat. 2021 Sep 28;54(3):744–52. doi: 10.4143/crt.2021.772 (PMC9296932; doi:10.4143/crt.2021.772), 2021-09-28
Supplement: crt-2021-772-suppl.pdf [file crt-2021-772-suppl.pdf]

**S1 Table.** Definitions of postoperative pulmonary complications according to the European Perioperative Clinical Outcome guidelines

| <b>Complications</b>          | <b>Definitions</b>                                                                                                                                                       |
|-------------------------------|--------------------------------------------------------------------------------------------------------------------------------------------------------------------------|
| <b>Minor complications</b>    |                                                                                                                                                                          |
| <b>Air leak</b>               | Prolonged air leak for > 7 days                                                                                                                                          |
| <b>Pneumothorax</b>           | Air densities in the pleural cavity                                                                                                                                      |
| <b>Atelectasis</b>            | Opacification of the lung, no radiologic finding of pneumonia                                                                                                            |
| <b>Pleural effusion</b>       | Fluid collection in the pleural cavity                                                                                                                                   |
| <b>Major complications</b>    |                                                                                                                                                                          |
| <b>Pneumonia</b>              | Signs indicating pneumonia on imaging studies with relevant clinical symptoms such as fever, dyspnea, or sputum                                                          |
| <b>ARDS</b>                   | Diagnosed according to the criteria of the Berlin definition 2012                                                                                                        |
| <b>Respiratory failure</b>    | Abnormal arterial blood gas test results ( $\text{PaO}_2 < 60$ mm Hg, $\text{PaO}_2/\text{FIO}_2 < 300$ mm Hg) or low oxyhemoglobin saturation on pulse oximetry (< 90%) |
| <b>Bronchopleural fistula</b> | Communication of the bronchus and pleura with pneumothorax on computed tomography or bronchoscopy                                                                        |
| <b>Empyema</b>                | Abnormal infectious fluid collection in the pleural cavity                                                                                                               |

ARDS, acute respiratory distress syndrome.
